# Supplementary material for: Hindrance of photodimerization of coumarin derivative induced by pillar[5]arene-based molecular recognition in water
Source: Royal Society of Chemistry journal article supplement (doi:10.1039/c6ra26741f), 2017-01-01
Supplement: c6ra26741f1.pdf [file c6ra26741f1.pdf]

*Electronic Supplementary Information*

**Impediment of photodimerization of coumarin derivative  
induced by pillar[5]arene-based molecular recognition in water**

**Chunwen Yang Haixiong Shi Shanshan Li and Qiao Li\***

Chunwen Yang Haixiong Shi Shanshan Li and Qiao Li \*

*College of Chemical Engineering, Lanzhou University of Arts and Science, Lanzhou,*

*Gansu 730000, P. R. China*

*Fax and Tel: +869318685568; Email address: gansuchengzhou@126.com*

|                                                                                            |           |
|--------------------------------------------------------------------------------------------|-----------|
| <i>Materials and methods</i> .....                                                         | <i>S2</i> |
| <i>Synthesis and characterizations of compounds</i> .....                                  | <i>S3</i> |
| <i>Critical aggregation concentration (CAC) determination of <b>G</b></i> .....            | <i>S7</i> |
| <i>NOESY NMR spectrum of <b>WP5</b>⊃<b>G</b> complex</i> .....                             | <i>S8</i> |
| <i>Critical aggregation concentration (CAC) determination of <b>WP5</b>⊃<b>G</b></i> ..... | <i>S8</i> |
| <i>References</i> .....                                                                    | <i>S9</i> |

## General methods

All reagents were commercially available and used as supplied without further purification. Compounds **WP5** were prepared according to published procedure.<sup>S1</sup> NMR spectra were recorded with a Bruker Avance DMX 400 spectrophotometer. Low-resolution electrospray ionization mass spectra were recorded with a Bruker Esquire 3000 Plus spectrometer. High-resolution mass spectrometry experiments were performed with a Bruker 7-Tesla FT-ICR mass spectrometer equipped with an electrospray source (Billerica, MA, USA). The determination of the critical aggregation concentration (CAC) values was carried out on a DDS-307 instrument. Transmission electron microscopy investigations were carried out on a JEM-1200EX instrument. Dynamic light scattering was carried out on a Malvern Nanosizer S instrument at room temperature.

### Synthesis of G-1

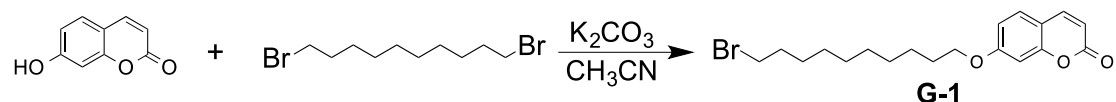

In a 250 mL round-bottom flask, 7-Hydroxycoumarin (3.24 g, 20.0 mmol),  $K_2CO_3$  (11.0 g, 80 mmol), 1,10-Dibromodecane (12.0 g, 40.0 mmol) and acetonitrile (100 mL) were added. The reaction mixture was stirred at reflux for 3 days. After the solid was filtered off, the solvent was removed. The solid was dissolved in  $CHCl_3$  (150 mL) and washed twice with  $H_2O$  (200 mL). The organic layer was dried over anhydrous  $Na_2SO_4$  and evaporated to afford the crude product, which was recrystallized with  $CH_3CN$  to give **G-1** (4.60 g, 60.0 %) as a white solid.  $^1H$  NMR (400 MHz,  $CDCl_3$ , 298 K)  $\delta$  (ppm): 7.65 (d,  $J = 8$  Hz 1H), 7.37 (d,  $J = 8$  Hz, 1H), 6.85–6.80 (m, 2H), 6.26 (d,  $J = 12$  Hz 1H), 4.01 (t,  $J = 16$  Hz 2H), 3.41 (t,  $J = 16$  Hz 2H), 1.87–1.79 (m, 4H), 1.47–1.43 (m, 4H), 1.33–1.32 (m, 8H). The  $^{13}C$  NMR (100 MHz,  $CDCl_3$ , 298K)  $\delta$  (ppm): 162.43, 161.34, 155.93, 143.49, 128.71, 113.02, 112.91, 112.37, 101.31, 68.64, 34.08, 32.81, 29.41, 29.28, 28.96, 28.73, 28.15, 25.94.

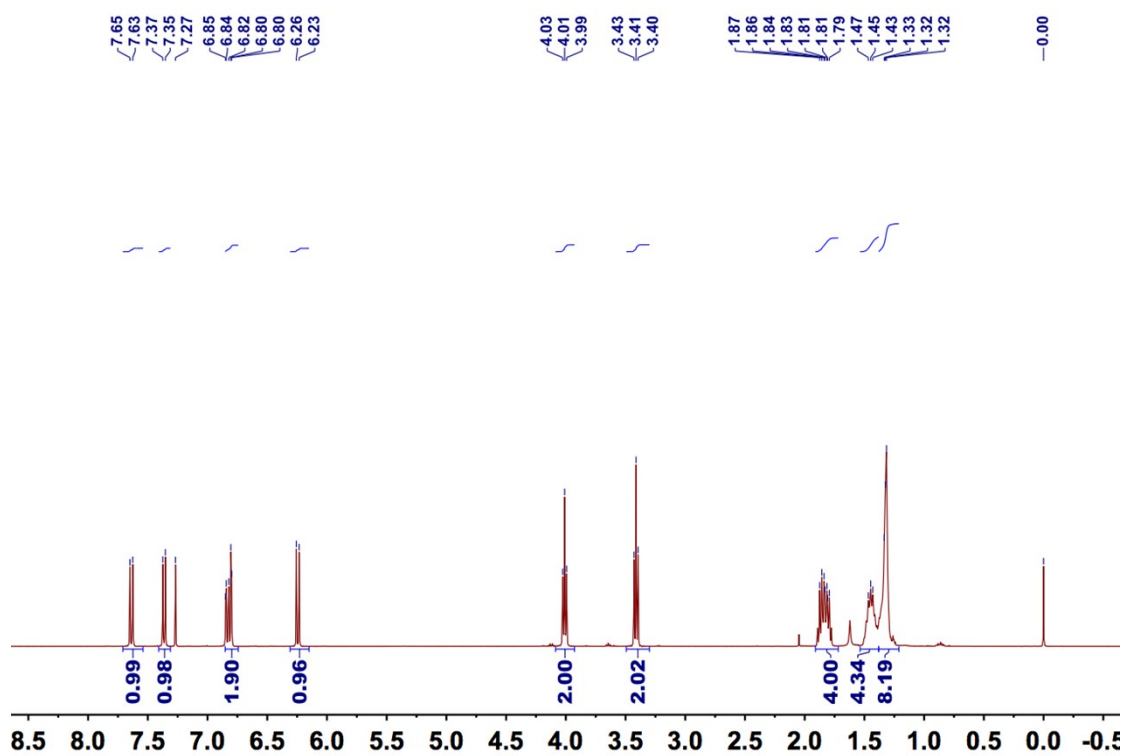

**Fig. S1** <sup>1</sup>H NMR spectrum (400 MHz, CDCl<sub>3</sub>, 298 K) of G-1.

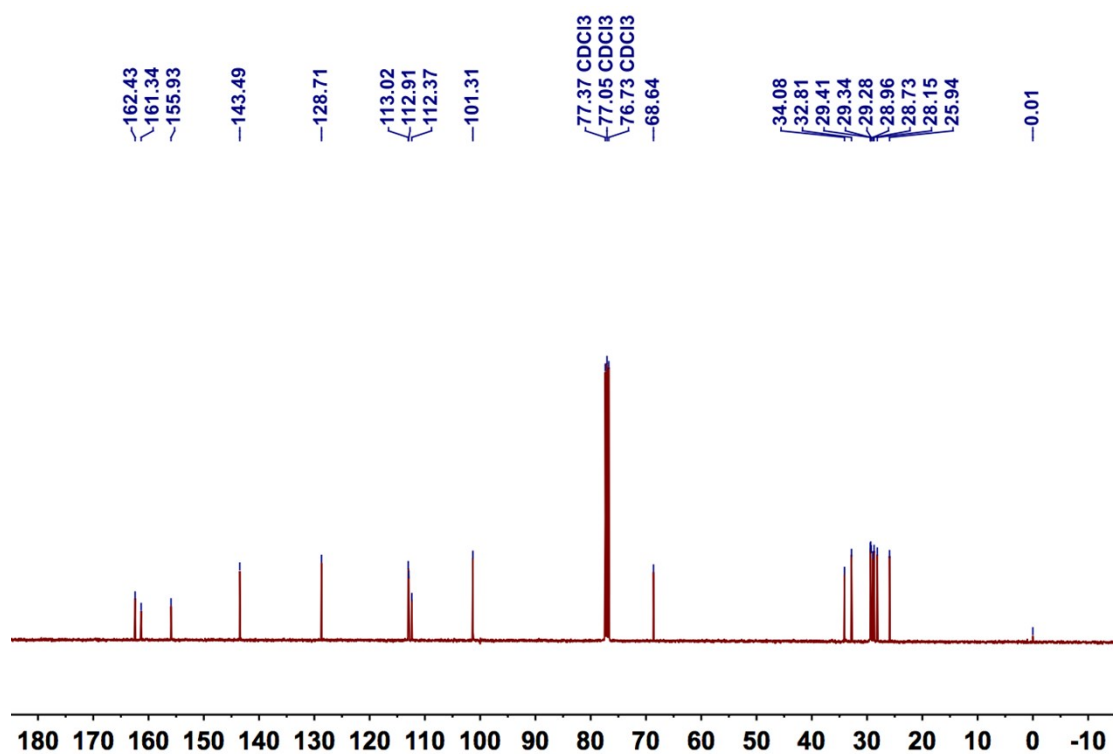

**Fig. S2** <sup>13</sup>C NMR spectrum (100 MHz, CDCl<sub>3</sub>, 298 K) of G-1.

### Synthesis of **G**

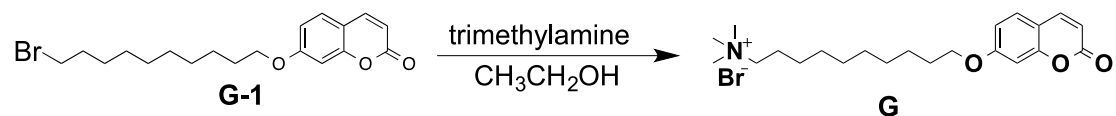

To a stirred solution of **G-1** (3.83 g, 10.0 mmol) in ethyl alcohol (40 mL) at room temperature was added trimethylamine (33.0% in ethyl alcohol, 4 mL). The resulting solution was refluxed for 24 h. The mixture was concentrated under reduced pressure to give compound **G** as a white solid (4.22 g, 96.0%). The proton NMR spectrum of **G** is shown in Fig. S3.  $^1\text{H}$  NMR (400 MHz,  $\text{CDCl}_3$ , 298K)  $\delta$  (ppm): 8.04 (d,  $J = 8$  Hz, 1H), 7.66 (d,  $J = 8$  Hz, 1H), 6.97–6.93 (m, 2H), 6.31 (t,  $J = 12$  Hz, 1H), 4.07 (t,  $J = 16$  Hz, 2H), 3.33 (m, 2H), 3.09 (m, 9H), 1.75–1.67 (m, 4H), 1.42–1.26 (m, 12H). The  $^{13}\text{C}$  NMR spectrum of **G** is shown in Fig. S4. The  $^{13}\text{C}$  NMR (125 MHz,  $\text{CDCl}_3$ , 298K)  $\delta$  (ppm): 161.83, 160.29, 155.37, 144.36, 129.48, 112.66, 112.31, 112.21, 101.05, 68.24, 65.17, 52.09, 52.05, 28.83, 28.72, 28.64, 28.46, 28.38, 25.72, 25.38, 22.01. LRESIMS:  $m/z$  360.2  $[1 - \text{Br}]^+$  (100%).

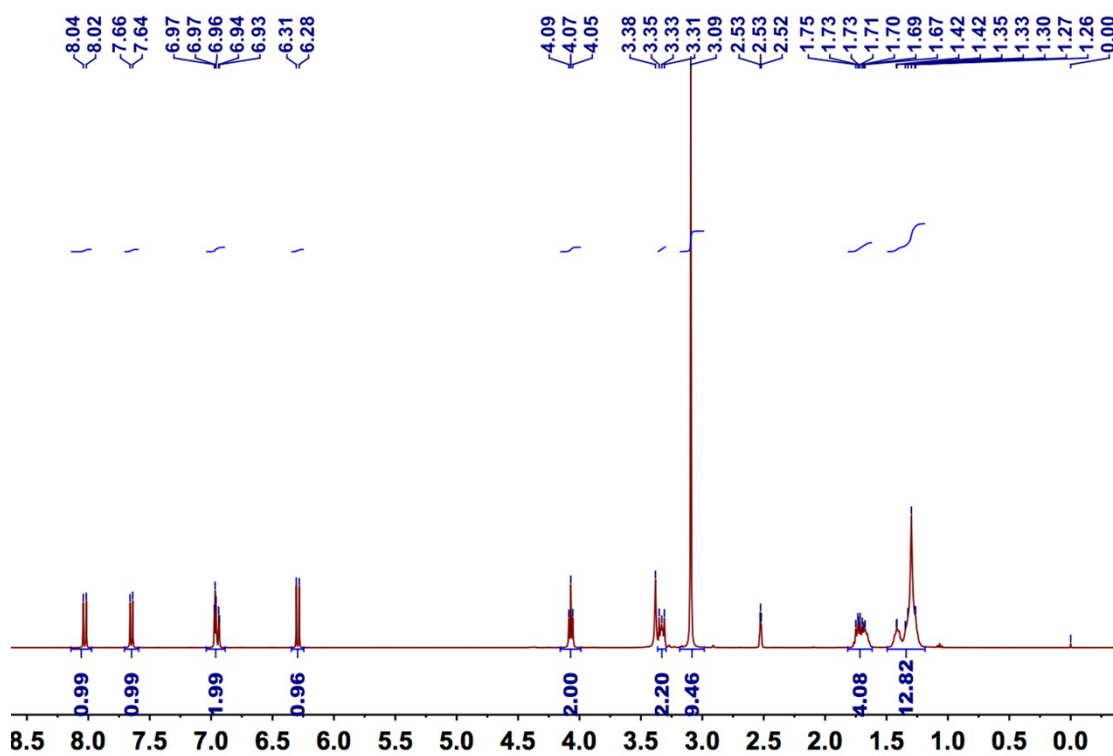

Fig. S3 <sup>1</sup>H NMR spectrum (400 MHz, DMSO-*d*<sub>6</sub>, 298K) of G.

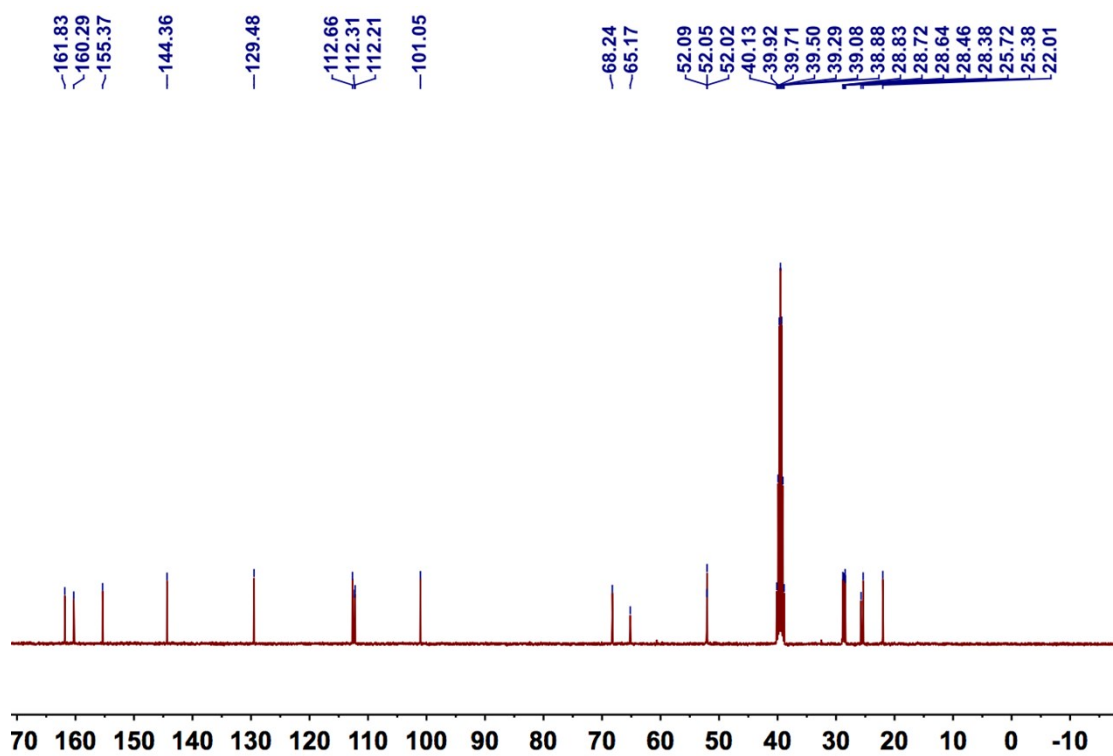

Fig. S4 <sup>13</sup>C NMR spectrum (100 MHz, DMSO-*d*<sub>6</sub>, 298K) of G.

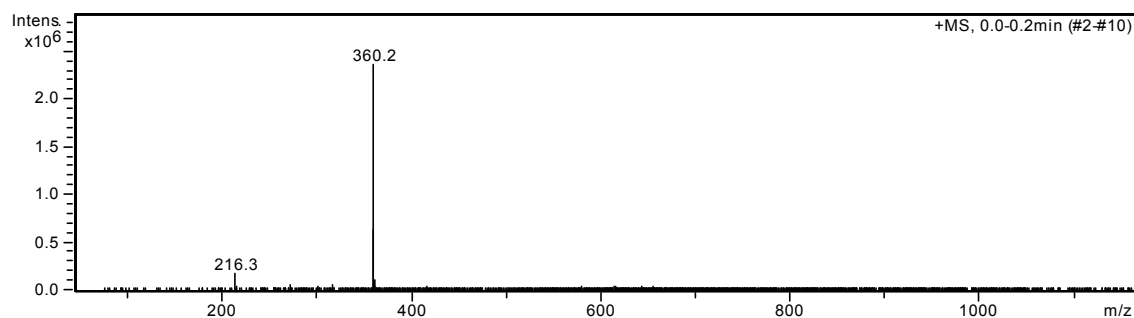

**Fig. S5** Electrospray ionization mass spectrum of **G**. Assignment of the main peak:  $m/z$  360.2 [**G** – Br]<sup>+</sup>.

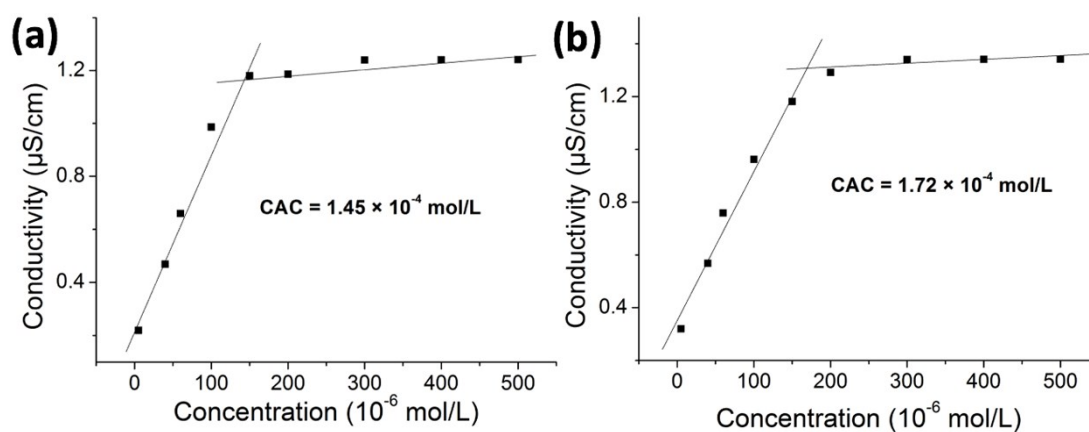

**Fig. S6** (a) Conductivity as a function of the concentration of **G** before UV-irradiation. There are two linear segments in the curve and a sudden reduction of the slope, implying that the critical aggregation concentration (CAC) of **G** before UV-irradiation is approximately 1.45 × 10<sup>-4</sup> M; (b) Conductivity as a function of the concentration of **G** after UV-irradiation. There are two linear segments in the curve and a sudden reduction of the slope, implying that the critical aggregation concentration (CAC) of **G** after UV-irradiation is approximately 1.72 × 10<sup>-4</sup> M.

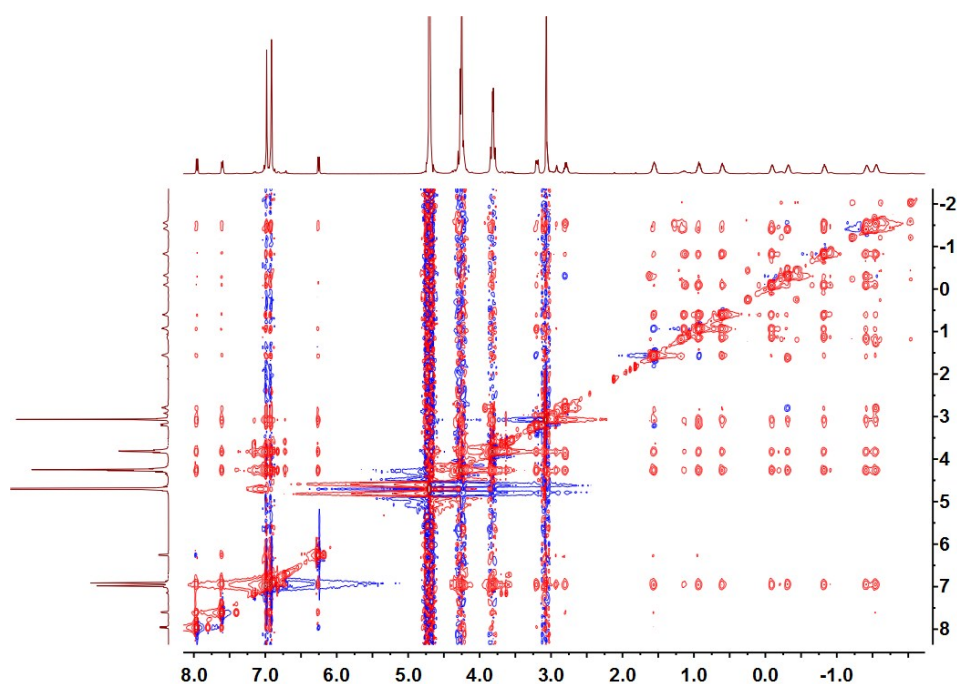

**Fig. S7** 2D NOESY NMR spectrum of spectrum of a solution of **WP5** (10.0 mM) and **G** (10.0 mM).

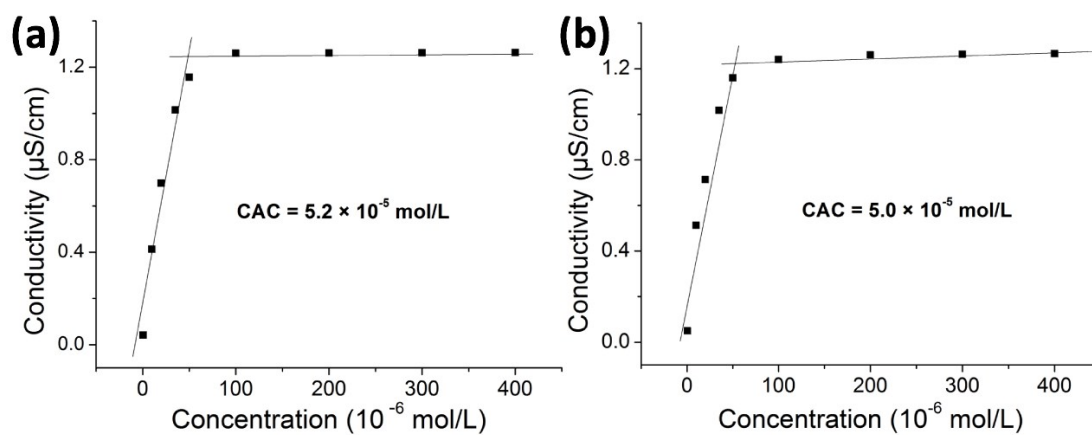

**Fig. S8** (a) Conductivity as a function of the concentration of **WP5G** before UV-irradiation. There are two linear segments in the curve and a sudden reduction of the slope, implying that the critical aggregation concentration (CAC) of **WP5G** before UV-irradiation is approximately  $5.2 \times 10^{-5}$  M; (b) Conductivity as a function of the concentration of **WP5G** after UV-irradiation. There are two linear segments in the curve and a sudden reduction of the slope, implying that the critical aggregation concentration (CAC) of **WP5G** after UV-irradiation is approximately  $5.0 \times 10^{-5}$  M.



## References

S1 (a) T. Ogoshi, S. Kanai, S. Fujinami, T. A. Yamagishi, Y. Nakamoto, *J. Am. Chem. Soc.* 2008, **130**, 5022; (b) G. Yu, M. Xue, Z. Zhang, J. Li, C. Han, F. Huang, *J. Am. Chem. Soc.* 2012, **134**, 13248.
